# Supplementary material for: Using quality scores and longer reads improves accuracy of Solexa read mapping
Source: PubMed Central journal article supplement (PMC2335322; doi:10.1186/1471-2105-9-128), 2008-02-28
Supplement: 1471-2105-9-128-S3.pdf [file 1471-2105-9-128-S3.pdf]

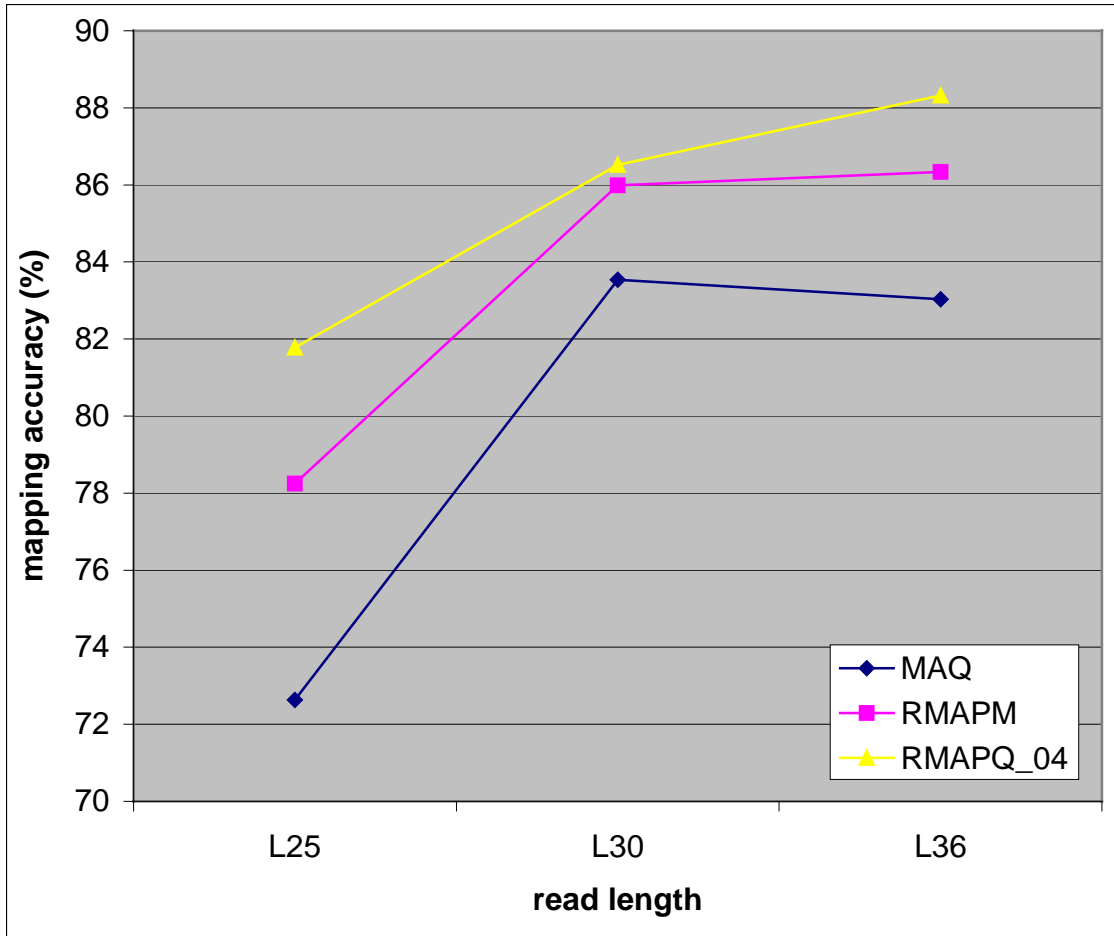

Supplementary figure 1: Accuracy comparison with MAQ: mapping accuracies of MAQ, RMAPM and RMAPQ. Three different read lengths were used {25bp, 30bp, 36bp}. Default parameter setting is used for MAQ. Two mismatches are allowed for RMAPM and RMAPQ, and quality score cutoff for RMAPQ is 4. Mapping accuracy = (coverage + selectivity)/2 (see main text).
