# Supplementary material for: Using quality scores and longer reads improves accuracy of Solexa read mapping
Source: PubMed Central journal article supplement (PMC2335322; doi:10.1186/1471-2105-9-128), 2008-02-28
Supplement: 1471-2105-9-128-S4.pdf [file 1471-2105-9-128-S4.pdf]

# Supplementary Information for: Using quality scores and longer reads improves accuracy of Solexa read mapping

Andrew D Smith

Zhenyu Xuan

Michael Q Zhang

## Supplementary Methods

**Counting mismatches between reads and genomic sequence.** In the RMAP program the basic comparison between a read and any genomic region involves counting the number of mismatches between those two strings. Since all of the reads, as well as the genome, are stored in a binary format, a few machine operations (mainly involving XORs) can produce a machine word that is essentially a bit vector having a '1' at every position where the two strings differ.

To count the number of '1's in such a bit vector, we use a technique that employs bit parallelism. Here is some C code for the function:

```
unsigned int count_ones(unsigned int bits) {  
    // ``bits`` is a machine word with a '1' where the read differs from the  
    // genomic region it is being compared with  
    bits = ((bits & 0xAAAAAAAAAAAAAAAA) >> 1) + (bits & 0x5555555555555555);  
    bits = ((bits & 0xCCCCCCCCCCCCCCCC) >> 2) + (bits & 0x3333333333333333);  
    bits = ((bits & 0xF0F0F0F0F0F0F0F0) >> 4) + (bits & 0x0F0F0F0F0F0F0F0F);  
    bits = ((bits & 0xFF00FF00FF00FF00) >> 8) + (bits & 0x00FF00FF00FF00FF);  
    bits = ((bits & 0xFFFF0000FFFF0000) >> 16) + (bits & 0x0000FFFF0000FFFF);  
    return ((bits & 0xFFFFFFFF00000000) >> 32) + (bits & 0x00000000FFFFFFFF);  
}
```

In case this doesn't make sense to you, the constants like "0xAAAAAAAAAAAAAAAA" are 64-bit hexadecimal numbers, the ">>" operator is a binary right-shift operator, and "&" is the bit-wise AND operator. Note that this code would only work on a 64-bit machine, because the mask constants (they start with "0x") are too large to fit in a 32-bit word. The technique counts '1's by adding up the number of '1's in parallel for different segments of the bit vector. The first line:

```
bits = ((bits & 0xAAAAAAAAAAAAAAAA) >> 1) + (bits & 0x5555555555555555);
```

starts with the vector of '1's where there are mismatches, and produces a vector with the counts of '1's in adjacent pairs of positions. We illustrate an example that assumes an 8-bit word. The code for 8 bits would look like:

```
unsigned int count_ones(unsigned int bits) {  
    bits = ((bits & 0xAA) >> 1) + (bits & 0x55);  
    bits = ((bits & 0xCC) >> 2) + (bits & 0x33);  
    return ((bits & 0xF0) >> 4) + (bits & 0x0F);  
}
```

Suppose we begin with the following:

11010010

Then the line would produce

$$((11010010 \& 10101010) \gg 1) \Rightarrow 01000001$$

on the left side of the sum (0xAA is 10101010 in binary), and

$$(11010010 \& 01010101) \Rightarrow 01010000$$

on the right side of the sum (0x55 is 01010101 in binary). Taking the addition gives the following result, in binary:

$$\begin{array}{r} 01\ 00\ 00\ 01 \\ + 01\ 01\ 00\ 00 \\ \hline 10\ 01\ 00\ 01 \end{array}$$

Notice that because the part “(bits & 0xAA)” was shifted to the right, the summands have no ‘1’ bits in the 1st, 3rd, 5th or 7th bits (big endian). The result is that bits 1 and 2 store the number of ‘1’s in the first two positions of the original bit vector; bits 3 and 4 store the number of ‘1’s in the 3rd and 4th positions of the original bit vector, and similar for the other pairs of adjacent positions.

Now “bits” has the binary value 10010001, and we will go through the second line of the code for an 8-bit word. On the left of the sum we obtain

$$((10010001 \& 11001100) \gg 2) \Rightarrow 00100000$$

(0xCC is 11001100 in binary); on the right of the sum we have

$$(10010001 \& 00110011) \Rightarrow 00010001$$

(0x33 is 00110011 in binary). Then these two are added together, which looks like this:

$$\begin{array}{r} 0010\ 0000 \\ + 0001\ 0001 \\ \hline 0011\ 0001 \end{array}$$

The binary number represented in just the first four bits of the result (*i.e.* 0011) is exactly the number of ‘1’s in the first four positions of the original bit vector. The binary number represented in the other four bits of the result (*i.e.* 0001) is exactly the number of ‘1’s in the other four positions of the original bit vector.

Now we have a value of “00110001” in “bits”, and we will do the final line of code:

```
return ((bits & 0xF0) >> 4) + (bits & 0x0F);
```

The left side of the sum gives the following:

$$((00110001 \& 11110000) \gg 4) \Rightarrow 00000011$$

(0xF0 is 1111000 in binary); on the right of the sum we get

$$(00110001 \& 00001111) \Rightarrow 00000001$$

The binary addition of these two numbers looks like

$$\begin{array}{r} 00000011 \\ + 00000001 \\ \hline 00000100 \end{array}$$

and 00000100 is 4 in decimal. This value is returned from our 8-bit function when applied to 11010010, and it is exactly the number of '1's.

This technique is well known (computer science “folklore”), and can be found in *Hacker's Delight* by Henry S Warren Jr. (Addison-Wesley, 2003).
